# Supplementary material for: Insights into cognitive and behavioral comorbidities of SLC6A1-related epilepsy: five new cases and literature review
Source: Front Neurosci. 2023 Aug 28;17:1215684. doi: 10.3389/fnins.2023.1215684 (PMC10493279; doi:10.3389/fnins.2023.1215684)
Supplement: Supplementary file 1 [file Table_1.XLSX]

## Sheet: Legend
	Abbreviation	Definitions
	ABAS	Adaptive Behaviour Assessment System
	ADI-R	Autism Diagnostic Interview Revised
	ADOS	Autism Diagnostic Observation Schedule
	AE	Absence Epilepsy
	ASD	Autism spectrum disorder
	AVZ-R	Revised scale for autism and related disorders
	CBRS	Conners’ Comprehensive Behavioural Rating Scale
	CNV	Copy Number Variant
	CPEP-3	Chinese Psychoeducational Profile
	DD/DR/ID	Developmental Delay / Developmental Regression/ Intellectual Disability
	DEE	Developmental Epileptic Encephalopathy
	DEL	Deletion
	EE	Epileptic encephalopathy
	ESSEON-R2	Dutch scale for emotional development in people with intellectual disability
	FE	Focal Epilepsy
	GE	Generalized Epilepsy
	MAE	Myoclonic Atonic Epilepsy
	NA	Not Available (Data)
	SCQ	Social Communication Questionnaire
	SDQ	Strength and Difficulties Questionnaire
	SRZ	Social Responsibility Scale
	TLE	Temporal lobe epilepsy
	VABS	Vineland-II Adaptive Behavior Scale
	WISC	Wechsler Intelligence Scale for Children
	WPPSI	Wechsler Preschool and Primary Scale of Intelligence

## Sheet: Data
Patient ID	Reference	Chr	Transcript	Protein	Variant type	Inheritance	Gender	Age at Inclusion (years)	Age at seizure onset (months)	Epilepsy	Focal Sz	GTC	Eyelid Myoclonia	Atonic	Myoclonic	Absence or Atypical Absence	Epilepsy Syndrome Classification	Cognitive Level	ADHD	Behavioral problems	Autistic traits/ASD	Test
SLC6A1_001	Rauch et al., 2012	3	c.452delT	p.Leu151ArgfsTer35	frameshift	de novo	Female	12	66	Yes	NA	NA	NA	Yes	Yes	NA	NA	ID	NA	NA	No	NA
SLC6A1_002	Sanders et al., 2012	3	c.863C>T	p.Ala288Val	missense	de novo	Male	NA	NA	Yes	NA	NA	NA	NA	NA	Yes	AE	DR, ID	Yes	Yes	Yes	NA
SLC6A1_003	Carvill et al., 2015	3	c.131G>A	p.Arg44Gln	missense	de novo	Female	8	30	Yes	No	No	NA	Yes	Yes	Yes	MAE	DD, mildID	No	Yes	Yes	NA
SLC6A1_004	Carvill et al., 2015	3	c.1000G>C	p.Ala334Pro	missense	inherited	Female	10	12	Yes	No	Yes	Yes	Yes	Yes	Yes	MAE	DD, moderateID	No	No	No	NA
SLC6A1_005	Carvill et al., 2015	3	c.889G>A	p.Gly297Arg	missense	de novo	Female	16	31	Yes	No	No	Yes	Yes	Yes	Yes	MAE	DR, severe ID	No	Yes	Yes	NA
SLC6A1_006	Carvill et al., 2015	3	c.578G>A	p.Trp193Ter	nonsense	de novo	Female	12	38	Yes	No	No	NA	Yes	Yes	Yes	MAE	DD, mildID	No	Yes	Yes	NA
SLC6A1_007	Carvill et al., 2015	3	c.1369-1370 delGG	p.Gly457HisFsTer10	frameshift	de novo	Male	12	36	Yes	No	No	No	Yes	Yes	Yes	MAE	Mild DD, ID	Yes	Yes	Yes	NA
SLC6A1_008	Carvill et al., 2015	3	c.863C>T	p.Ala288Val	missense	de novo	Female	44	12	Yes	No	Yes	Yes	Yes	Yes	Yes	MAE	DD, DR, moderate ID	No	Yes	No	NA
SLC6A1_009	Carvill et al., 2015	3	c.863C>T	p.Ala288Val	missense	inherited	Female	22	14	Yes	No	Yes	Yes	Yes	Yes	Yes	MAE	DD, DR, moderateID	No	Yes	Yes	NA
SLC6A1_010	Carvill et al., 2015	3			CNV (3p25.3 deletion)	de novo	Female	7	36	Yes	No	No	NA	Yes	Yes	Yes	MAE	Mild DD, Moderate ID	No	No	No	NA
SLC6A1_011	Halvorsen et al., 2016	3	c.1084G>A	p.Gly362Arg	missense	inherited	Male	NA	12	Yes	No	Yes	No	Yes	No	Yes	EE	Moderate DD, ID	No	No	No	NA
SLC6A1_012	Lucariello et al., 2016	3	c.919G>A	p.Gly307Arg	missense	de novo	Female	3	0-12	Yes	NA	NA	NA	NA	NA	NA	NA	NA	NA	NA	NA	NA
SLC6A1_013	Palmer et al., 2016	3	c.491G>A	p.Cys164Tyr	missense	de novo	Female	10	16	Yes	No	No	No	Yes	Yes	Yes	MAE	DR	No	No	No	NA
SLC6A1_014	Yuan et al., 2017	3	c.1015T>C	p.Phe339Leu	missense	de novo	NA	NA	NA	NA	NA	NA	NA	NA	NA	NA	NA	Borderline Intellectual functioning	NA	Yes	Yes	ADOS, ADI-R
SLC6A1_015	Bowling et al., 2017	3	c.1352A>G	p.Asp451Gly	missense	de novo	NA	NA	NA	Yes	NA	NA	NA	NA	NA	NA	NA	Moderate ID	NA	Yes	Yes	NA
SLC6A1_016	Islam et al., 2018	3	c.302A>G	p.Glu101Gly	missense	de novo	Female	3	NA	Yes	No	Yes	No	Yes	Yes	No	MAE	DR, ID	No	Yes	Yes	NA
SLC6A1_017	Johanensen et al., 2018	3	c.104dupA	p.Lys36GluFsTer171	frameshift	de novo	Female	6	5	Yes	No	No	Yes	Yes	No	Yes	AE	Moderate DD, ID	NA	NA	NA	NA
SLC6A1_018	Johanensen et al., 2018	3	c.223G>A	p.Gly75Arg	missense	de novo	Male	13	48	Yes	No	No	No	No	No	Yes	NA	Mild DD, ID	No	No	No	NA
SLC6A1_019	Johanensen et al., 2018	3	c.419A>G	p.Tyr140Cys	missense	de novo	Female	17	24	Yes	No	No	No	Yes	Yes	Yes	MAE	Mild DD, ID	No	No	No	NA
SLC6A1_020	Johanensen et al., 2018	3	c.434C>T	p.Ser145Phe	missense	de novo	Female	2.3	NA	NA	No	No	No	No	No	No	NA	Mild DD, ID	No	Yes	Yes	NA
SLC6A1_021	Johanensen et al., 2018	3	c.578G>A	p.Thp193Ter	nonsense	de novo	Female	12	38	Yes	No	No	No	Yes	Yes	Yes	MAE	Mild DD, ID	No	No	Yes	NA
SLC6A1_022	Johanensen et al., 2018	3	c.695G>T	p.Gly232Val	missense	de novo	Male	10	24	Yes	No	No	No	No	No	Yes	MAE	Mild DD, ID	No	No	No	NA
SLC6A1_023	Johanensen et al., 2018	3	c.695G>T	p.Gly232Val	missense	inherited	Male	17	12	Yes	No	No	No	Yes	No	Yes	MAE	Moderate DD, ID	No	No	No	NA
SLC6A1_024	Johanensen et al., 2018	3	c.695G>T	p.Gly232Val	missense	inherited	Female	10	13	Yes	No	No	No	Yes	No	Yes	MAE	Mild DD, ID	No	No	No	NA
SLC6A1_025	Johanensen et al., 2018	3	c.695G>T	p.Gly232Val	missense	unknown	Female	NA	NA	NA	No	No	No	No	No	No	NA	Normal with LD	No	No	No	NA
SLC6A1_026	Johanensen et al., 2018	3	c.809T>C	p.Phe270Ser	missense	de novo	Male	7	18	Yes	No	No	No	No	No	Yes	NA	Mild DD, ID	Yes	Yes	No	NA
SLC6A1_027	Johanensen et al., 2018	3	c.863C>T	p.Ala288Val	missense	de novo	Male	8	22	Yes	No	No	No	Yes	Yes	Yes	MAE	Mild DD, ID	No	No	No	NA
SLC6A1_028	Johanensen et al., 2018	3	c.863C>T	p.Ala288Val	missense	unknown	Female	7	60	Yes	Yes	No	No	No	No	Yes	NA	Moderate DD, ID	No	Yes	Yes	NA
SLC6A1_029	Johanensen et al., 2018	3	c.881-883del	p.Phe294del	inframe del	de novo	Male	12	18	Yes	No	No	No	Yes	Yes	Yes	MAE	Moderate DD, ID	Yes	No	No	NA
SLC6A1_030	Johanensen et al., 2018	3	c.987C>A	p.Cys329Ter	nonsense	de novo	Female	11	66	Yes	NA	NA	No	NA	NA	NA	MAE	Mild DD, ID	No	Yes	No	NA
SLC6A1_031	Johanensen et al., 2018	3	c.1024G>A	p.Val342Met	missense	inherited	Male	19	24	Yes	No	Yes	No	Yes	No	Yes	MAE	Severe DD, ID	Yes	No	No	NA
SLC6A1_032	Johanensen et al., 2018	3	c.1024G>A	p.Val342Met	missense	inherited	Male	12	15	Yes	No	No	No	Yes	Yes	Yes	MAE	Moderate DD, ID	No	Yes	Yes	NA
SLC6A1_033	Johanensen et al., 2018	3	c.1024G>A	p.Val342Met	missense	inherited	Male	28	NA	Yes	No	Yes	No	No	No	Yes	AE	Normal	NA	NA	NA	NA
SLC6A1_034	Johanensen et al., 2018	3	c.1024G>A	p.Val342Met	missense	inherited	Female	NA	NA	NA	No	No	No	No	No	No	NA	Mild DD, ID	No	No	No	NA
SLC6A1_035	Johanensen et al., 2018	3	c.1024G>A	p.Val342Met	missense	de novo	Male	NA	36	Yes	No	No	No	No	No	Yes	NA	Normal with LD	NA	NA	NA	NA
SLC6A1_036	Johanensen et al., 2018	3	c.1024G>A	p.Val342Met	missense	de novo	Male	8	60	Yes	No	No	No	No	No	Yes	NA	Moderate DD, ID	No	No	Yes	NA
SLC6A1_037	Johanensen et al., 2018	3	c.1024G>A	p.Val342Met	missense	de novo	Female	5	24	Yes	No	No	No	Yes	Yes	Yes	MAE	Moderate DD, ID	Yes	Yes	No	NA
SLC6A1_038	Johanensen et al., 2018	3	c.1024G>A	p.Val342Met	missense	de novo	Female	10	13	Yes	No	No	Yes	No	No	Yes	NA	Moderate DD, ID	No	No	Yes	NA
SLC6A1_039	Johanensen et al., 2018	3	c.1070C>T	p.Ala357Val	missense	de novo	Female	9	11	Yes	No	No	No	Yes	No	Yes	MAE	Mild DD, ID	No	No	No	NA
SLC6A1_040	Johanensen et al., 2018	3	c.1084G>A	p.Gly362Arg	missense	unknown	Female	21	84	Yes	Yes	Yes	No	No	No	No	TLE	Moderate DD, ID	No	No	No	NA
SLC6A1_041	Johanensen et al., 2018	3	c.1155C>G	p.Phe385Leu	missense	de novo	Male	10	15	Yes	No	No	No	Yes	Yes	No	MAE	Mild DD, ID	No	No	Yes	NA
SLC6A1_042	Johanensen et al., 2018	3	c.1342A>T	p.Lys448Ter	nonsense	de novo	Female	10	36	Yes	No	No	No	Yes	Yes	No	MAE	Moderate DD, ID	No	No	Yes	NA
SLC6A1_043	Johanensen et al., 2018	3	c.1377C>G	p.Ser459Arg	missense	de novo	Female	13	60	Yes	No	No	No	No	No	Yes	NA	Severe DD, ID	No	Yes	No	NA
SLC6A1_044	Johanensen et al., 2018	3	c.1531G>A	p.Val511Met	missense	de novo	Male	5	12	Yes	No	No	No	No	No	Yes	NA	Mild DD, ID	Yes	No	No	NA
SLC6A1_045	Johanensen et al., 2018	3	c.1600C>T	p.Gln534Ter	nonsense	de novo	Female	5	24	Yes	No	No	Yes	Yes	Yes	Yes	MAE	Mild DD, ID	Yes	No	No	NA
SLC6A1_046	Johanensen et al., 2018	3	c.850-2A>G	p.?	splice site	de novo	Female	4	16	Yes	No	No	No	Yes	Yes	Yes	MAE	Mild DD, ID	NA	NA	NA	NA
SLC6A1_047	Johanensen et al., 2018	3	c.1528-1G>C	p.?	splice site	de novo	Female	12	72	Yes	No	No	No	No	No	Yes	AE	Mild DD, ID	NA	NA	NA	NA
SLC6A1_048	Liu et al., 2018	3	c.490G>A	p.Val164Met	missense	de novo	NA	NA	NA	NA	NA	NA	NA	NA	NA	NA	NA	DD, ID	NA	NA	NA	NA
SLC6A1_049	Mattison et al., 2018	3	c.281G>A	p.Gly94Glu	missense	unknown	Female	NA	NA	NA	NA	NA	NA	NA	NA	NA	NA	NA	NA	NA	NA	NA
SLC6A1_050	Mattison et al., 2018	3	c.703T>C	p.Trp235Arg	missense	unknown	Female	NA	NA	Yes	No	Yes	No	No	No	Yes	AE	NA	No	Yes	Yes	NA
SLC6A1_051	Mattison et al., 2018	3	c.815-817delTCA	p.Ile272del	inframe del	de novo	Male	NA	NA	Yes	Yes	No	No	Yes	No	Yes	MAE	Moderate ID	No	No	No	NA
SLC6A1_052	Mattison et al., 2018	3	c.1334A>G	p.Tyr445Cys	missense	unknown	Female	NA	NA	Yes	NA	NA	NA	NA	NA	NA	GE	NA	NA	NA	NA	NA
SLC6A1_053	Mattison et al., 2018	3	c.1487G>A	p.Trp496Ter	nonsense	unknown	Male	NA	NA	Yes	No	No	No	No	No	Yes	GE	NA	no	Yes	Yes	NA
SLC6A1_054	Satterstorm et al., 2018	3	c.160C>T	p.Leu54Phe	missense	unknown	Male	NA	NA	NA	NA	NA	NA	NA	NA	NA	NA	NA	NA	NA	Yes	NA
SLC6A1_055	Satterstorm et al., 2018	3	c.593A>C	p.His198Pro	missense	unknown	Male	NA	NA	NA	NA	NA	NA	NA	NA	NA	NA	NA	NA	NA	Yes	NA
SLC6A1_056	Satterstorm et al., 2018	3	c.863C>T	p.Ala288Val	missense	unknown	Male	NA	NA	Yes	NA	NA	NA	NA	NA	NA	NA	NA	NA	NA	Yes	NA
SLC6A1_057	Satterstorm et al., 2018	3	c.896G>T	p.Gly299Val	missense	unknown	Female	NA	NA	NA	NA	NA	NA	NA	NA	NA	NA	NA	NA	NA	Yes	NA
SLC6A1_058	Satterstorm et al., 2018	3	c.919G>A	p.Gly307Arg	missense	unknown	Female	NA	NA	Yes	NA	NA	NA	NA	NA	NA	NA	NA	NA	NA	Yes	NA
SLC6A1_059	Satterstorm et al., 2018	3	c.1024G>A	p.Val342Met	missense	unknown	Female	NA	NA	Yes	NA	NA	NA	NA	NA	NA	NA	NA	NA	NA	Yes	NA
SLC6A1_060	Satterstorm et al., 2018	3	c.1078G>A	p.Gly360Ser	missense	unknown	Female	NA	NA	Yes	NA	NA	NA	NA	NA	NA	NA	NA	NA	NA	Yes	NA
SLC6A1_061	Satterstorm et al., 2018	3	c.1648G>A	p.Gly550Arg	missense	unknown	Male	NA	NA	Yes	NA	NA	NA	NA	NA	NA	NA	NA	NA	NA	Yes	NA
SLC6A1_062	Snoeijen-Schouwenaars et al., 2018	3	c.1024G>A	p.Val342Met	missense	de novo	Male	NA	NA	Yes	NA	NA	NA	NA	NA	NA	NA	Moderate DD, ID	NA	NA	NA	NA
SLC6A1_063	Snoeijen-Schouwenaars et al., 2018	3	c.130C>T	p.Arg44Trp	missense	de novo	Male	NA	NA	Yes	NA	NA	NA	NA	NA	NA	NA	NA	NA	NA	NA	NA
SLC6A1_064	Borlot et al., 2019	3	c.1460T>C	p.Met487Thr	missense	de novo	Male	19	144	Yes	No	Yes	No	No	No	Yes	MAE	Mild ID	Yes	Yes	No	NA
SLC6A1_065	Kim et al., 2019	3	c.1323+1G>A	p.?	splice site	unknown	Female	7.7	41	Yes	No	Yes	NA	No	No	Yes	AE	DD	Yes	NA	No	NA
SLC6A1_066	Kim et al., 2019	3	c.850-1G>T	p.?	splice site	unknown	Male	12.4	50	Yes	No	Yes	NA	No	No	Yes	AE	Normal	NA	NA	No	NA
SLC6A1_067	Kim et al., 2019	3	c.913G>C	p.Ala305Pro	missense	de novo	Male	8.3	15	NA	No	No	NA	No	No	Yes	NA	DD	NA	NA	No	NA
SLC6A1_068	Kim et al., 2019	3	c.1070C>T	p.Ala357Val	missense	de novo	Female	11.6	23	Yes	No	Yes	NA	Yes	Yes	Yes	AE	DD	NA	NA	No	NA
SLC6A1_069	Kim et al., 2019	3	c.130C>T	p.Arg44Trp	missense	unknown	Male	9.3	28	Yes	No	No	NA	No	No	Yes	AE	Normal with LD	NA	NA	No	NA
SLC6A1_070	Kim et al., 2019	3	c.456C>A	p.Tyr152Ter	nonsense	de novo	Female	8.7	51	Yes	No	Yes	NA	No	No	Yes	AE	DD	NA	NA	No	NA
SLC6A1_071	Posar and Visconti, 2019	3	c.1697G>A	p.Arg566His	missense	inherited	Male	8	144	Yes	No	No	Yes	No	No	Yes	MAE	Normal with LD	No	No	No	WISC-III and IV
SLC6A1_072	Truty et al., 2019	3	c.863C>T	p.Ala288Val	missense	unknown	NA	NA	NA	Yes	NA	NA	NA	NA	NA	NA	NA	NA	NA	NA	NA	NA
SLC6A1_073	Truty et al., 2019	3	c.1070C>T	p.Ala357Val	missense	unknown	NA	NA	NA	Yes	NA	NA	NA	NA	NA	NA	NA	NA	NA	NA	NA	NA
SLC6A1_074	Truty et al., 2019	3	c.1255del	p.Arg419Alafs*15	frameshift	unknown	NA	NA	NA	Yes	NA	NA	NA	NA	NA	NA	NA	NA	NA	NA	NA	NA
SLC6A1_075	Truty et al., 2019	3	c.1435C>T	p.Arg479Ter	nonsense	unknown	NA	NA	NA	Yes	NA	NA	NA	NA	NA	NA	NA	NA	NA	NA	NA	NA
SLC6A1_076	Truty et al., 2019	3	c.223G>A	p.Gly75Arg	missense	unknown	NA	NA	NA	Yes	NA	NA	NA	NA	NA	NA	NA	NA	NA	NA	NA	NA
SLC6A1_077	Truty et al., 2019	3	c.640-658del	p.Leu214SerfsTer32	frameshift	unknown	NA	NA	NA	Yes	NA	NA	NA	NA	NA	NA	NA	NA	NA	NA	NA	NA
SLC6A1_078	Truty et al., 2019	3	c.1460T>C	p.Met487Thr	missense	unknown	NA	NA	NA	Yes	NA	NA	NA	NA	NA	NA	NA	NA	NA	NA	NA	NA
SLC6A1_079	Truty et al., 2019	3	c.523-524insA	p.Ser175TyrfsTer32	frameshift	unknown	NA	NA	NA	Yes	NA	NA	NA	NA	NA	NA	NA	NA	NA	NA	NA	NA
SLC6A1_080	Truty et al., 2019	3	c.1377C>G	p.Ser459Arg	missense	unknown	NA	NA	NA	Yes	NA	NA	NA	NA	NA	NA	NA	NA	NA	NA	NA	NA
SLC6A1_081	Truty et al., 2019	3	c.1024G>A	p.Val342Met	missense	unknown	NA	NA	NA	Yes	NA	NA	NA	NA	NA	NA	NA	NA	NA	NA	NA	NA
SLC6A1_082	Truty et al., 2019	3	c.1335dup	p.Val446CysfsTer6	frameshift	unknown	NA	NA	NA	Yes	NA	NA	NA	NA	NA	NA	NA	NA	NA	NA	NA	NA
SLC6A1_083	Truty et al., 2019	3	c.1531G>A	p.Val511Met	missense	unknown	NA	NA	NA	Yes	NA	NA	NA	NA	NA	NA	NA	NA	NA	NA	NA	NA
SLC6A1_084	Truty et al., 2019	3	c.1427-1G>A	p.?	splice site	unknown	NA	NA	NA	Yes	NA	NA	NA	NA	NA	NA	NA	NA	NA	NA	NA	NA
SLC6A1_085	Truty et al., 2019	3	c.471+1G>T	p.?	splice site	unknown	NA	NA	NA	Yes	NA	NA	NA	NA	NA	NA	NA	NA	NA	NA	NA	NA
SLC6A1_086	Devries et al., 2020	3	c.1328G > A	p.Gly443Asp	missense	de novo	Female	2	19	Yes	No	No	Yes	No	No	Yes	AE	DD	No	Yes	Yes	NA
SLC6A1_087	Goodspeed et al., 2020 - Epi25 Collaborative	3	c.99G>T	p.Lys33Asn	missense	unknown	NA	NA	NA	Yes	NA	NA	NA	NA	NA	NA	FE	NA	NA	NA	No	NA
SLC6A1_088	Goodspeed et al., 2020 - Epi25 Collaborative	3	c.966C>G	p.Ile322Met	missense	unknown	NA	NA	NA	Yes	NA	NA	NA	NA	NA	NA	FE	NA	NA	NA	No	NA
SLC6A1_089	Goodspeed et al., 2020 - Epi25 Collaborative	3	c.939C>A	p.His313Gln	missense	unknown	NA	NA	NA	Yes	NA	NA	NA	NA	NA	NA	FE	NA	NA	NA	No	NA
SLC6A1_090	Goodspeed et al., 2020 - Epi25 Collaborative	3	c.889G>A	p.Gly297Arg	missense	unknown	NA	NA	NA	Yes	NA	NA	NA	NA	NA	NA	DEE	NA	NA	NA	No	NA
SLC6A1_091	Goodspeed et al., 2020 - Epi25 Collaborative	3	c.863C>T	p.Ala288Val	missense	unknown	NA	NA	NA	Yes	NA	NA	NA	NA	NA	NA	DEE	NA	NA	NA	No	NA
SLC6A1_092	Goodspeed et al., 2020 - Epi25 Collaborative	3	c.784C>T	p.Pro262Ser	missense	unknown	NA	NA	NA	Yes	NA	NA	NA	NA	NA	NA	GE	NA	NA	NA	No	NA
SLC6A1_093	Goodspeed et al., 2020 - Epi25 Collaborative	3	c.724T>G	p.Phe242Val	missense	unknown	NA	NA	NA	Yes	NA	NA	NA	NA	NA	NA	GE	NA	NA	NA	No	NA
SLC6A1_094	Goodspeed et al., 2020 - Epi25 Collaborative	3	c.724T>G	p.Phe242Val	missense	unknown	NA	NA	NA	Yes	NA	NA	NA	NA	NA	NA	FE	NA	NA	NA	No	NA
SLC6A1_095	Goodspeed et al., 2020 - Epi25 Collaborative	3	c.636G>A	p.Trp212Ter	nonsense	unknown	NA	NA	NA	Yes	NA	NA	NA	NA	NA	NA	DEE	NA	NA	NA	No	NA
SLC6A1_096	Goodspeed et al., 2020 - Epi25 Collaborative	3	c.593A>G	p.His198Arg	missense	unknown	NA	NA	NA	Yes	NA	NA	NA	NA	NA	NA	GE	NA	NA	NA	No	NA
SLC6A1_097	Goodspeed et al., 2020 - Epi25 Collaborative	3	c.584G>A	p.Arg195His	missense	unknown	NA	NA	NA	Yes	NA	NA	NA	NA	NA	NA	FE	NA	NA	NA	No	NA
SLC6A1_098	Goodspeed et al., 2020 - Epi25 Collaborative	3	c.583C>A	p.Arg195Ser	missense	unknown	NA	NA	NA	Yes	NA	NA	NA	NA	NA	NA	GE	NA	NA	NA	No	NA
SLC6A1_099	Goodspeed et al., 2020 - Epi25 Collaborative	3	c.55G>C	p.Glu19Gln	missense	unknown	NA	NA	NA	Yes	NA	NA	NA	NA	NA	NA	GE	NA	NA	NA	No	NA
SLC6A1_100	Goodspeed et al., 2020 - Epi25 Collaborative	3	c.415T>C	p.Tyr139His	missense	unknown	NA	NA	NA	Yes	NA	NA	NA	NA	NA	NA	GE	NA	NA	NA	No	NA
SLC6A1_101	Goodspeed et al., 2020 - Epi25 Collaborative	3	c.332G>A	p.Gly111Glu	missense	unknown	NA	NA	NA	Yes	NA	NA	NA	NA	NA	NA	GE	NA	NA	NA	No	NA
SLC6A1_102	Goodspeed et al., 2020 - Epi25 Collaborative	3	c.331G>C	p.Gly111Arg	missense	unknown	NA	NA	NA	Yes	NA	NA	NA	NA	NA	NA	DEE	NA	NA	NA	No	NA
SLC6A1_103	Goodspeed et al., 2020 - Epi25 Collaborative	3	c.223G>A	p.Gly75Arg	missense	unknown	NA	NA	NA	Yes	NA	NA	NA	NA	NA	NA	GE	NA	NA	NA	No	NA
SLC6A1_104	Goodspeed et al., 2020 - Epi25 Collaborative	3	c.1723G>A	p.Glu575Lys	missense	unknown	NA	NA	NA	Yes	NA	NA	NA	NA	NA	NA	FE	NA	NA	NA	No	NA
SLC6A1_105	Goodspeed et al., 2020 - Epi25 Collaborative	3	c.1722C>G	p.Ser574Arg	missense	unknown	NA	NA	NA	Yes	NA	NA	NA	NA	NA	NA	FE	NA	NA	NA	No	NA
SLC6A1_106	Goodspeed et al., 2020 - Epi25 Collaborative	3	c.1589C>T	p.Pro530Leu	missense	unknown	NA	NA	NA	Yes	NA	NA	NA	NA	NA	NA	GE	NA	NA	NA	No	NA
SLC6A1_107	Goodspeed et al., 2020 - Epi25 Collaborative	3	c.1579T>C	p.Tyr527His	missense	unknown	NA	NA	NA	Yes	NA	NA	NA	NA	NA	NA	GE	NA	NA	NA	No	NA
SLC6A1_108	Goodspeed et al., 2020 - Epi25 Collaborative	3	c.1531G>A	p.Val511Met	missense	unknown	NA	NA	NA	Yes	NA	NA	NA	NA	NA	NA	GE	NA	NA	NA	No	NA
SLC6A1_109	Goodspeed et al., 2020 - Epi25 Collaborative	3	c.1477T>C	p.Cys493Arg	missense	unknown	NA	NA	NA	Yes	NA	NA	NA	NA	NA	NA	GE	NA	NA	NA	No	NA
SLC6A1_110	Goodspeed et al., 2020 - Epi25 Collaborative	3	c.1343A>G	p.Lys448Arg	missense	unknown	NA	NA	NA	Yes	NA	NA	NA	NA	NA	NA	GE	NA	NA	NA	No	NA
SLC6A1_111	Goodspeed et al., 2020 - Epi25 Collaborative	3	c.1337T>A	p.Val446Asp	missense	unknown	NA	NA	NA	Yes	NA	NA	NA	NA	NA	NA	GE	NA	NA	NA	No	NA
SLC6A1_112	Goodspeed et al., 2020 - Epi25 Collaborative	3	c.1255C>T	p.Arg419Cys	missense	unknown	NA	NA	NA	Yes	NA	NA	NA	NA	NA	NA	GE	NA	NA	NA	No	NA
SLC6A1_113	Goodspeed et al., 2020 - Epi25 Collaborative	3	c.1191+1G>T	p.?	splice site	unknown	NA	NA	NA	Yes	NA	NA	NA	NA	NA	NA	GE	NA	NA	NA	No	NA
SLC6A1_114	Goodspeed et al., 2020 - Epi25 Collaborative	3	c.1084G>A	p.Gly362Arg	missense	unknown	NA	NA	NA	Yes	NA	NA	NA	NA	NA	NA	GE	NA	NA	NA	No	NA
SLC6A1_115	Goodspeed et al., 2020 - Epi25 Collaborative	3	c.1070C>T	p.Ala357Val	missense	unknown	NA	NA	NA	Yes	NA	NA	NA	NA	NA	NA	GE	NA	NA	NA	No	NA
SLC6A1_116	Goodspeed et al., 2020 - Epi25 Collaborative	3	c.1057A>G	p.Ile353Val	missense	unknown	NA	NA	NA	Yes	NA	NA	NA	NA	NA	NA	GE	NA	NA	NA	No	NA
SLC6A1_117	Goodspeed et al., 2020 - SLC6A1-Connect	3	c.884C>T	p.Ser295Leu	missense	unknown	NA	1.3	NA	No	No	No	No	No	No	No	No Seizures	NA	No	No	No	NA
SLC6A1_118	Goodspeed et al., 2020 - SLC6A1-Connect	3	c.752T>C	p.Leu251Pro	missense	de novo	NA	21	NA	No	No	No	No	No	No	No	No seizures	NA	NA	NA	NA	NA
SLC6A1_119	Goodspeed et al., 2020 - SLC6A1-Connect	3	c.523-524insA	p.Ser175TyrfsTer32	frameshift	unknown	Female	2.7	12	Yes	No	No	Yes	No	No	Yes	AE	DD	No	No	No	NA
SLC6A1_120	Goodspeed et al., 2020 - SLC6A1-Connect	3	c.302A>G	p.Glu101Gly	missense	unknown	NA	3.5	30	NA	No	No	No	Yes	No	Yes	NA	Mild DD, ID	No	No	Yes	NA
SLC6A1_121	Goodspeed et al., 2020 - SLC6A1-Connect	3	c.317A>G	p.Gln106Arg	missense	unknown	NA	9	NA	NA	NA	NA	NA	NA	NA	NA	NA	Moderate DD, ID	No	Yes	No	NA
SLC6A1_122	Goodspeed et al., 2020 - SLC6A1-Connect	3	c.283G>T	p.Val95Phe	missense	inherited	NA	10	15	Yes	Yes	No	No	No	No	No	FE	Mild DD, ID	Yes	No	No	NA
SLC6A1_123	Goodspeed et al., 2020 - SLC6A1-Connect	3	c.154G>A	p.Asp52Asn	missense	de novo	NA	10	48	Yes	No	No	No	No	No	Yes	NA	Mild DD, ID	NA	NA	NA	NA
SLC6A1_124	Goodspeed et al., 2020 - SLC6A1-Connect	3	NA	NA	CNV	unknown	NA	4	NA	No	No	No	No	No	No	No	No seizures	NA	No	No	No	NA
SLC6A1_125	Goodspeed et al., 2020 - SLC6A1-Connect	3	c.331G>A	p.Gly111Arg	missense	de novo	NA	2	NA	No	No	No	No	No	No	No	No seizures	NA	No	No	No	NA
SLC6A1_126	Goodspeed et al., 2020 - SLC6A1-Connect	3	c.131G>A	p.Arg44Gln	missense	de novo	NA	4	NA	NA	NA	NA	NA	NA	NA	NA	NA	NA	NA	NA	Yes	NA
SLC6A1_127	Goodspeed et al., 2020 - SLC6A1-Connect	3	c.812A>G	p.Tyr271Cys	missense	de novo	NA	6	NA	No	No	No	No	No	No	No	No seizures	Normal with LD	Yes	No	Yes	NA
SLC6A1_128	Goodspeed et al., 2020 - SLC6A1-Connect	3	c.236G>T	p.Gly79Val	missense	unknown	NA	26	NA	Yes	No	No	No	Yes	Yes	NA	MAE	NA	No	No	No	NA
SLC6A1_129	Goodspeed et al., 2020 - SLC6A1-Connect	3	c.1168-1176del	p.Leu390Leu392del	inframe del	de novo	NA	3	30	Yes	No	No	No	Yes	No	No	NA	Severe DD/ID	No	No	Yes	NA
SLC6A1_130	Goodspeed et al., 2020 - SLC6A1-Connect	3	c.863C>T	p.Ala288Val	missense	unknown	Male	2	NA	NA	NA	NA	NA	NA	NA	NA	NA	NA	NA	NA	NA	NA
SLC6A1_131	Goodspeed et al., 2020 - SLC6A1-Connect	3	c.863C>T	p.Ala288Val	missense	unknown	Female	7	NA	NA	NA	NA	NA	NA	NA	NA	NA	NA	NA	NA	NA	NA
SLC6A1_132	Goodspeed et al., 2020 - SLC6A1-Connect	3	c.1427-9A>G	p.?	splice site	de novo	Male	1.6	NA	No	No	No	No	No	No	No	No seizures	Severe DD, ID	No	No	No	NA
SLC6A1_133	Goodspeed et al., 2020 - SLC6A1-Connect	3	c.226A>G	p.Lys76Glu	missense	de novo	Female	2.9	18	Yes	No	No	Yes	Yes	Yes	No	MAE	Mild DD, ID	No	No	No	NA
SLC6A1_134	Goodspeed et al., 2020 - SLC6A1-Connect	3	c.330del	p.Ile110MetfsTer4	frameshift	de novo	Female	17	NA	No	No	No	No	No	No	No	No seizures	Severe DD, ID	No	Yes	Yes	NA
SLC6A1_135	Hinokuma et al., 2020	3	c.739C>G	p.Pro247Ala	missense	de novo	Female	16	48	Yes	No	No	NA	Yes	NA	No	NA	Mild ID	No	No	No	WISC-IV , Japanese Enjoji Developmental scale, and the Kyoto Scale of Psychological Development
SLC6A1_136	Rees et al., 2020	3	c.277G>A	p.Ala93Thr	missense	de novo	Female	NA	NA	NA	No	No	No	No	No	No	NA	Normal	No	No	No	NA
SLC6A1_137	Rees et al., 2020	3	c.631C>T	p.Arg211Cys	missense	de novo	NA	NA	NA	No	No	No	No	No	No	No	No seizures	Normal	No	No	No	NA
SLC6A1_138	Rees et al., 2020	3	c.1484G>T	p.Trp495Leu	missense	de novo	NA	NA	NA	No	No	No	No	No	No	No	No seizures	Normal	No	No	No	NA
SLC6A1_139	Tang et al., 2020	3	c.419A>G	p.Tyr140Cys	missense	de novo	Female	16	17	Yes	No	No	No	Yes	Yes	Yes	MAE	ID	No	No	Yes	ABAS- II Parent Form. SCQ Autoscore Form. CBRS. SDQ. WPPSI/WISC; Bayleys.
SLC6A1_140	Tang et al., 2020	3	c.1155C>G	p.Phe385Leu	missense	de novo	Male	8	13	Yes	No	No	No	Yes	Yes	Yes	MAE	DD, ID	No	Yes	Yes	ABAS- II Parent Form. SCQ Autoscore Form. CBRS. SDQ. WPPSI/WISC; Bayleys.
SLC6A1_141	Wang et al., 2020	3	c.1081C>A	p. Pro361Thr	missense	de novo	Female	6	24	Yes	No	No	No	Yes	No	Yes	GE	DR, Severe ID	No	Yes	Yes	ADI-R, ADOS-G, CPEP-3.
SLC6A1_142	Yuan et al., 2020	3	c.881-883del	p.Phe294del	inframe del	de novo	Male	4	32	Yes	Yes	No	No	Yes	Yes	Yes	MAE	Mild ID	Yes	Yes	Yes	NA
SLC6A1_143	Cai et al., 2021	3	c.700G>A	p.Gly234Ser	missense	de novo (or maternal)*	Male	14	114	Yes	Yes	Yes	No	Yes	Yes	No	LGS	Moderate ID	No	No	No	NA
SLC6A1_144	Poliquin et al., 2021	3	c.373G>A	p.Val125Met	missense	inherited	Female	16	12	Yes	No	Yes	Yes	Yes	Yes	Yes	MAE	Moderate ID	Yes	Yes	No	NA
SLC6A1_145	Poliquin et al., 2021	3	c.373G>A	p.Val125Met	missense	inherited	Female	8	48	Yes	No	Yes	Yes	Yes	Yes	Yes	MAE	Moderate ID	Yes	Yes	No	NA
SLC6A1_146	Salinas et al., 2021	3	c.518G>C	p.Cys173Ser	missense	de novo	Male	NA	NA	Yes	NA	NA	NA	Yes	Yes	NA	MAE	NA	NA	NA	NA	NA
SLC6A1_147	Fischer et al., 2022 - ClinVar ID 987286	3	c.155A>T	p.Asp52Val	missense	inherited	NA	NA	NA	NA	NA	NA	NA	NA	NA	NA	NA	DD	NA	NA	NA	NA
SLC6A1_148	Fischer et al., 2022 - ClinVar ID 987287	3	c.156C>G	p.Asp52Glu	missense	inherited	NA	NA	NA	NA	NA	NA	NA	NA	NA	NA	NA	DD	NA	NA	NA	NA
SLC6A1_149	Fischer et al., 2022 - ClinVar ID 987288	3	c.158T>C	p.Phe53Ser	missense	inherited	NA	NA	NA	NA	NA	NA	NA	NA	NA	NA	NA	DD	NA	NA	NA	NA
SLC6A1_150	Kahen et al., 2022	3	c. 871C>T	p. Gln291Ter	nonsense	de novo	Female	12	NA	Yes	No	No	NA	No	Yes	Yes	NA	DD	No	No	No	VABS,CBCL
SLC6A1_151	Kahen et al., 2022	3	c. 881-883del	p. Phe294del	inframe del	unknown	Female	3	12	Yes	No	No	NA	Yes	Yes	Yes	MAE	DD	No	Yes	Yes	VABS, CBCL
SLC6A1_152	Kahen et al., 2022	3	c.1222delC	p. Leu408TrpfsTer26	frameshift	unknown	Male	6	24	Yes	No	No	NA	No	Yes	Yes	NA	DD	Yes	No	No	VABS, CBCL
SLC6A1_153	Kahen et al., 2022	3	c.1255delC	p. Arg419AlafsTer15	frameshift	unknown	Female	14	24	Yes	No	No	NA	Yes	Yes	Yes	MAE	DD	Yes	Yes	Yes	VABS, CBCL
SLC6A1_154	Kahen et al., 2022	3	c.1595G>A	p. Trp532Ter	nonsense	unknown	Male	4	12	Yes	No	No	NA	Yes	No	No	NA	DD	No	Yes	Yes	VABS, CBCL
SLC6A1_155	Kahen et al., 2022	3	c.1595G>A	p. Trp532Ter	nonsense	unknown	Male	9	12	Yes	No	No	NA	Yes	No	Yes	NA	DD	No	Yes	Yes	VABS, CBCL
SLC6A1_156	Kahen et al., 2022	3	c.1695+1G>A	p.?	splice site	de novo	Male	14	24	Yes	No	No	NA	No	No	Yes	NA	ID	Yes	No	No	VABS, CBCL
SLC6A1_157	Kahen et al., 2022	3	c.131G>A	p. Arg44Gln	missense	unknown	Female	3	24	Yes	No	No	NA	Yes	Yes	No	MAE	DD	No	No	No	VABS, CBCL
SLC6A1_158	Kahen et al., 2022	3	c.130C>T	p. Arg44Trp	missense	de novo	Male	8	24	Yes	No	No	NA	Yes	Yes	Yes	MAE	Normal	No	Yes	Yes	VABS, CBCL
SLC6A1_159	Kahen et al., 2022	3	c.302A>G	p. Glu101Gly	missense	de novo	Female	8	NA	Yes	No	No	NA	Yes	No	Yes	NA	DD, ID	No	Yes	Yes	VABS, CBCL
SLC6A1_160	Kahen et al., 2022	3	c.331G>A	p. Gly111Arg	missense	de novo	Male	3	NA	NA	NA	NA	NA	NA	NA	NA	NA	DD	No	Yes	Yes	VABS, CBCL
SLC6A1_161	Kahen et al., 2022	3	c.752T>C	p. Leu251Pro	missense	de novo	Female	22	NA	NA	NA	NA	NA	NA	NA	NA	NA	DD, ID	No	No	No	VABS, CBCL
SLC6A1_162	Kahen et al., 2022	3	c.863C>T	p. Ala288Val	missense	inherited	Male	2	24	Yes	No	No	No	No	No	Yes	AE	DD	No	No	No	VABS, CBCL
SLC6A1_163	Kahen et al., 2022	3	c.863C>T	p. Ala288Val	missense	de novo	Female	4	NA	NA	NA	NA	NA	NA	NA	NA	NA	NA	No	No	No	VABS, CBCL
SLC6A1_164	Kahen et al., 2022	3	c.884C>T	p. Ser295Leu	missense	de novo	Male	2	NA	Yes	No	No	No	No	No	Yes	AE	DD	No	No	No	VABS, CBCL
SLC6A1_165	Kahen et al., 2022	3	c.889G>A	p. Gly297Arg	missense	de novo	Female	3	12	Yes	No	No	NA	No	Yes	Yes	NA	DD	No	No	No	VABS, CBCL
SLC6A1_166	Kahen et al., 2022	3	c.889G>A	p. Gly297Arg	missense	de novo	Female	16	36	Yes	No	No	No	No	No	Yes	AE	NA	No	No	No	VABS, CBCL
SLC6A1_167	Kahen et al., 2022	3	c.913G>A	p. Ala305Thr	missense	unknown	Male	5	36	Yes	No	No	NA	Yes	Yes	Yes	MAE	DD	No	No	No	VABS, CBCL
SLC6A1_168	Kahen et al., 2022	3	c.919G>A	p. Gly307Arg	missense	de novo	Male	23	NA	Yes	No	Yes	NA	Yes	Yes	Yes	MAE	ID	No	Yes	Yes	VABS, CBCL
SLC6A1_169	Kahen et al., 2022	3	c.980A>G	p. Asn327Ser	missense	de novo	Male	20	12	Yes	No	No	NA	Yes	No	Yes	NA	DD, ID	No	Yes	Yes	VABS, CBCL
SLC6A1_170	Kahen et al., 2022	3	c.991A>G	p. Ser331Gly	missense	de novo	Male	4	NA	NA	NA	NA	NA	NA	NA	NA	NA	DD	No	No	No	VABS, CBCL
SLC6A1_171	Kahen et al., 2022	3	c.991A>G	p. Ser331Gly	missense	de novo	Female	15	12	Yes	No	Yes	NA	No	Yes	Yes	GE	DD, ID	Yes	No	No	VABS, CBCL
SLC6A1_172	Kahen et al., 2022	3	c.1024G>A	p.Val342Met	missense	de novo	Male	1	NA	NA	NA	NA	NA	NA	NA	NA	NA	DD	No	No	No	VABS, CBCL
SLC6A1_173	Kahen et al., 2022	3	c.1084G>A	p. Gly362Arg	missense	de novo	Male	6	24	Yes	No	No	NA	Yes	Yes	Yes	MAE	DD	No	No	No	VABS, CBCL
SLC6A1_174	Kahen et al., 2022	3	c.1084G>A	p. Gly362Arg	missense	de novo	Male	6	24	Yes	No	No	NA	No	Yes	No	NA	DD	No	No	No	VABS, CBCL
SLC6A1_175	Kahen et al., 2022	3	c.1084G>A	p. Gly362Arg	missense	de novo	Male	11	96	Yes	NA	NA	NA	NA	Yes	Yes	NA	ID	No	No	No	VABS, CBCL
SLC6A1_176	Kahen et al., 2022	3	c.1084G>A	p. Gly362Arg	missense	unknown	Male	8	12	Yes	Yes	No	NA	Yes	Yes	Yes	MAE	DD, ID	No	Yes	Yes	VABS, CBCL
SLC6A1_177	Kahen et al., 2022	3	c.1531G>A	p. Val511Met	missense	inherited	Female	12	108	Yes	NA	NA	NA	NA	NA	Yes	NA	ID	Yes	No	No	VABS, CBCL
SLC6A1_178	Verhoeven et al., 2022	3	c.1163T>G	p.Met388Arg	missense	de novo	Male	55	48	Yes	Yes	Yes	NA	NA	Yes	Yes	MAE	Severe ID	No	Yes	Yes	Terman Stanford Achievement Test, Leiter, ESSEON-R2, SRZ, AVZ-R, ADOS
SLC6A1_179	Piniella et al.,2023	3	c.919G>A	p.Gly307Arg	missense	de novo	Female	47	60	Yes	No	No	Yes	Yes	Yes	Yes	MAE	Moderate ID	No	Yes	Yes	NA
SLC6A1_180	Piniella et al.,2023	3	c.919G>A	p.Gly307Arg	missense	de novo	Male	2.5	15	Yes	No	No	Yes	No	Yes	Yes	MAE	DD, Moderate ID	No	Yes	Yes	NA
SLC6A1_181	Kalvakuntla et al., 2023	3	c.884C>T	p.Ser295Leu	missense	de novo	Male	NA	NA	Yes	No	No	NA	No	No	Yes	NA	DR	NA	NA	Yes	NA
SLC6A1_182	Kalvakuntla et al., 2023	3	c.863C>T	p.Ala288Val	missense	de novo	Female	NA	NA	Yes	No	No	NA	Yes	No	No	NA	DR	NA	NA	Yes	NA
SLC6A1_183	Kalvakuntla et al., 2023	3	c.1222delC	p.Leu408TrpfsTer26	frameshift	unknown	Male	NA	NA	Yes	No	No	NA	Yes	Yes	No	NA	DR	NA	NA	No	NA
SLC6A1_184	Kalvakuntla et al., 2023	3	c.104dupA	p.Leu36GlufsTer171	frameshift	unknown	Female	NA	NA	Yes	No	No	NA	Yes	Yes	No	NA	DR	NA	NA	Yes	NA
SLC6A1_185	Kalvakuntla et al., 2023	3	c.340G>A	p.Gly114Arg	missense	unknown	Female	NA	NA	Yes	No	No	NA	No	Yes	Yes	NA	DR	NA	NA	Yes	NA
SLC6A1_186	Kalvakuntla et al., 2023	3	c.863C>T	p.Ala288Val	missense	de novo	Male	NA	NA	Yes	Yes	No	NA	Yes	No	No	NA	DR	NA	NA	Yes	NA
SLC6A1_187	Kalvakuntla et al., 2023	3	c.79C>T	p.Pro27Ser	missense	unknown	Female	NA	NA	Yes	No	No	NA	Yes	No	No	NA	DR	NA	NA	Yes	NA
SLC6A1_188	Kalvakuntla et al., 2023	3	c.302A>G	p.Glu101Gly	missense	de novo	Female	NA	NA	Yes	No	No	NA	Yes	Yes	Yes	NA	DR	NA	NA	Yes	NA
SLC6A1_189	Kalvakuntla et al., 2023	3	c.863C>T	p.Ala288Val	missense	inherited	Male	NA	NA	Yes	No	No	NA	No	No	Yes	NA	NA	NA	NA	Yes	NA
SLC6A1_190	Kalvakuntla et al., 2023	3	c.130C>T	p.Arg44Trp	missense	de novo	Male	NA	NA	Yes	No	Yes	NA	No	Yes	Yes	NA	NA	NA	NA	Yes	NA
SLC6A1_191	Kalvakuntla et al., 2023	3	c.154G>A	p.Asp52Asn	missense	de novo	Male	NA	NA	Yes	No	No	NA	Yes	No	Yes	NA	NA	NA	NA	Yes	NA
SLC6A1_192	Kalvakuntla et al., 2023	3	c.1084G>A	p.Gly362Arg	missense	de novo	Male	NA	NA	Yes	No	No	NA	Yes	Yes	Yes	NA	NA	NA	NA	No	NA
SLC6A1_193	Kalvakuntla et al., 2023	3	c.339delA	p.Val115Tyr	missense	unknown	Male	NA	NA	Yes	No	No	NA	Yes	No	Yes	NA	NA	NA	NA	No	NA
SLC6A1_194	Kalvakuntla et al., 2023	3	c.331G>A	p.Gly111Arg	missense	de novo	Male	NA	NA	Yes	No	No	NA	No	No	Yes	NA	NA	NA	NA	Yes	NA
SLC6A1_195	Kalvakuntla et al., 2023	3	c.130C>T	p.Arg44Trp	missense	de novo	Female	NA	NA	No	No	No	No	No	No	No	No	NA	NA	NA	No	NA
SLC6A1_196	Kalvakuntla et al., 2023	3	c.889G>A	p.Gly297Arg	missense	de novo	Female	NA	NA	Yes	No	No	NA	Yes	No	Yes	NA	NA	NA	NA	Yes	NA
SLC6A1_197	Kalvakuntla et al., 2023	3	c.1527+2T>C	p.?	splice site	de novo	Female	NA	NA	Yes	No	No	NA	Yes	Yes	No	NA	NA	NA	NA	Yes	NA
SLC6A1_198	Kalvakuntla et al., 2023	3	c.583C>T	p.Arg195Cys	missense	unknown	Female	NA	NA	Yes	No	No	NA	No	Yes	No	NA	NA	NA	NA	No	NA
SLC6A1_199	Kalvakuntla et al., 2023	3	c.889G>A	p.Gly297Arg	missense	de novo	Female	NA	NA	Yes	No	No	NA	Yes	No	Yes	NA	NA	NA	NA	No	NA
SLC6A1_200	Kalvakuntla et al., 2023	3	c.1070C>T	p.Ala357Val	missense	inherited	Female	NA	NA	Yes	No	No	NA	Yes	No	Yes	NA	NA	NA	NA	No	NA
SLC6A1_201	Kalvakuntla et al., 2023	3	c.913G>A	p.Ala305Thr	missense	unknown	Male	NA	NA	Yes	No	No	NA	Yes	Yes	Yes	NA	NA	NA	NA	Yes	NA
SLC6A1_202	Kalvakuntla et al., 2023	3	c.340G>A	p.Gly114Arg	missense	unknown	Female	NA	NA	No	No	No	No	No	No	No	No	NA	NA	NA	No	NA
SLC6A1_203	Kalvakuntla et al., 2023	3	c.919G>A	p.Gly307Arg	missense	de nove	Male	NA	NA	Yes	No	Yes	NA	Yes	Yes	Yes	NA	NA	NA	NA	No	NA
SLC6A1_204	Kalvakuntla et al., 2023	3	c.1120C>T	p.Gln374Ter	nonsense	de novo	Female	NA	NA	Yes	No	No	NA	No	No	Yes	NA	NA	NA	NA	No	NA
